# Supplementary material
Source: publisher figshare collection journal article supplement (https://tandf.figshare.com/ndownloader/files/21663837)
Supplement: Supplementary file 1 [file 21663837]

**Appendix**

List of the experimental pictures and distractors. English translations are given in brackets.

| **Target name** | **Alternative (basic-level) name** | **Related distractor** | **Unrelated distractor** |
| --- | --- | --- | --- |
| Palme [palm tree] | Baum [tree] | Bauer [farmer] | Foto [photograph] |
| Tanne [fir] | Baum [tree] | Bauer [farmer] | Foto [photograph] |
| Rose [rose] | Blume [flower] | Bluse [blouse] | Karren [barrow] |
| Tulpe [tulip] | Blume [flower] | Bluse [blouse] | Karren [barrow] |
| Hai [shark] | Fisch [fish] | Filter [filter] | Bauer [farmer] |
| Aal [eel] | Fisch [fish] | Filter [filter] | Bauer [farmer] |
| Jeans [jeans] | Hose [trousers] | Hobel [plane] | Nutria [nutria] |
| Leggings [leggings] | Hose [trousers] | Hobel [plane] | Nutria [nutria] |
| Dackel [dachshund] | Hund [dog] | Humpen [beaker] | Sporn [spur] |
| Pudel [poodle] | Hund [dog] | Humpen [beaker] | Sporn [spur] |
| Barbie [barbie] | Puppe [doll] | Pumpe [pump] | Hobel [plane] |
| Matroschka [matryoshka] | Puppe [doll] | Pumpe [pump] | Hobel [plane] |
| Füller [fountain pen] | Stift [pen] | Stirn [forehead] | Pumpe [pump] |
| Kuli [ballpoint pen] | Stift [pen] | Stirn [forehead] | Pumpe [pump] |
| Ente [duck] | Vogel [bird] | Foto [photograph] | Bude [shack] |
| Storch [stork] | Vogel [bird] | Foto [photograph] | Bude [shack] |
| Toast [toast] | Brot [bread] | Brom [bromine] | Auge [eye] |
| Sandwich [sandwich] | Brot [bread] | Brom [bromine] | Auge [eye] |
| Atlas [atlas] | Buch [book] | Bude [shack] | Stirn [forehead] |
| Duden [dictionary] | Buch [book] | Bude [shack] | Stirn [forehead] |
| Boxer [boxer] | Sportler [athlete] | Sporn [spur] | Humpen [beaker] |
| Golfer [golfer] | Sportler [athlete] | Sporn [spur] | Humpen [beaker] |
| Ass [ace] | Karte [card] | Karren [barrow] | Bluse [blouse] |
| Joker [joker] | Karte [card] | Karren [barrow] | Bluse [blouse] |
| Flipflop [flipflop] | Schuh [shoe] | Schule [school] | Käfig [cage] |
| Sandale [sandal] | Schuh [shoe] | Schule [school] | Käfig [cage] |
| Trabi [Trabant] | Auto [car] | Auge [eye] | Brom [bromine] |
| Smart [Smart] | Auto [car] | Auge [eye] | Brom [bromine] |
| Mozzarella [mozzarella] | Käse [cheese] | Käfig [cage] | Schule [school] |
| Parmesan [parmesan] | Käse [cheese] | Käfig [cage] | Schule [school] |
| Spaghetti [spaghetti] | Nudeln [noodles] | Nutria [nutria] | Filter [filter] |
| Tortellini [tortellini] | Nudeln [noodles] | Nutria [nutria] | Filter [filter] |
